# Supplementary material for: Experimental Infection of Adapted Influenza B Virus in Mice Model
Source: Preprints.org preprint supplement (doi:10.20944/preprints202002.0022.v1), 2020-02-03
Supplement: Supplementary file 1 [file supplementary]

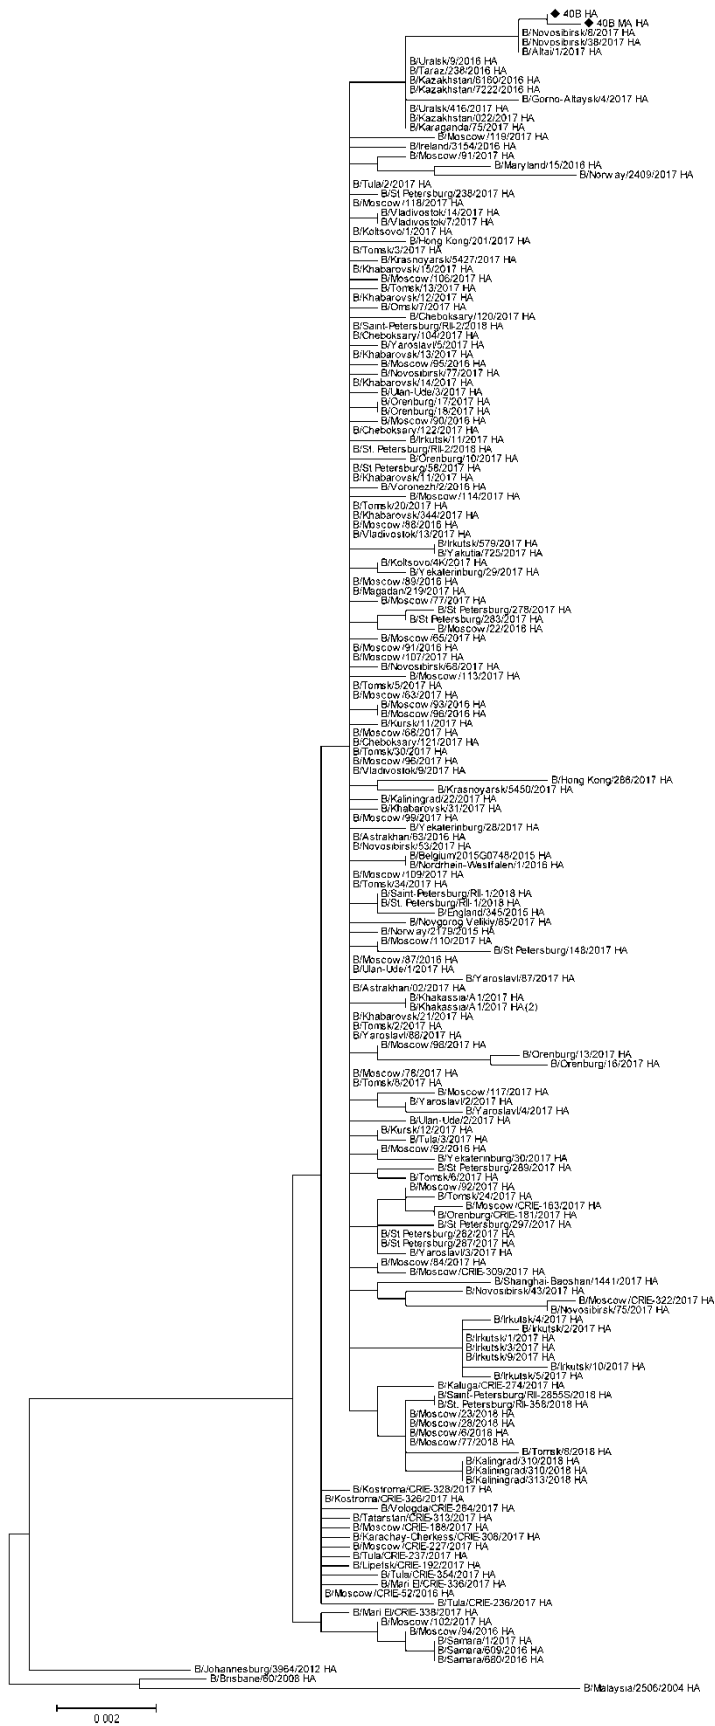

Figure 1. Phylogenetic dendrogram of a segment genome encoding HA of the influenza B virus. Studied strains are marked with black rhombuses.

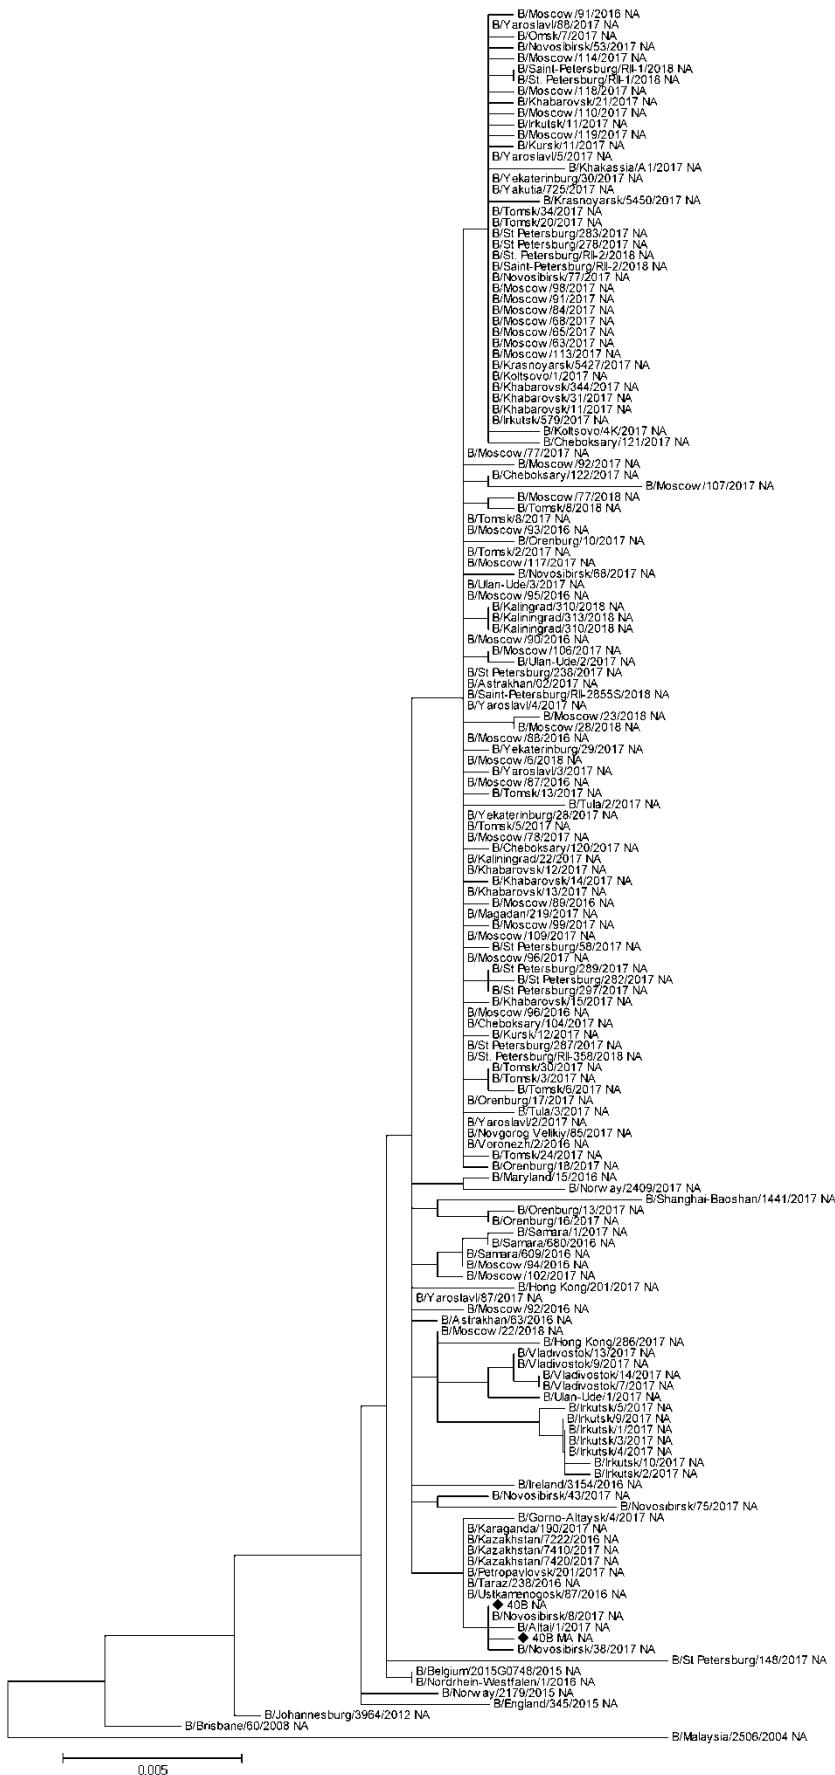

Figure 2. Phylogenetic dendrogram of a segment genome encoding NA of influenza B virus. Studied strains are marked with black diamonds.

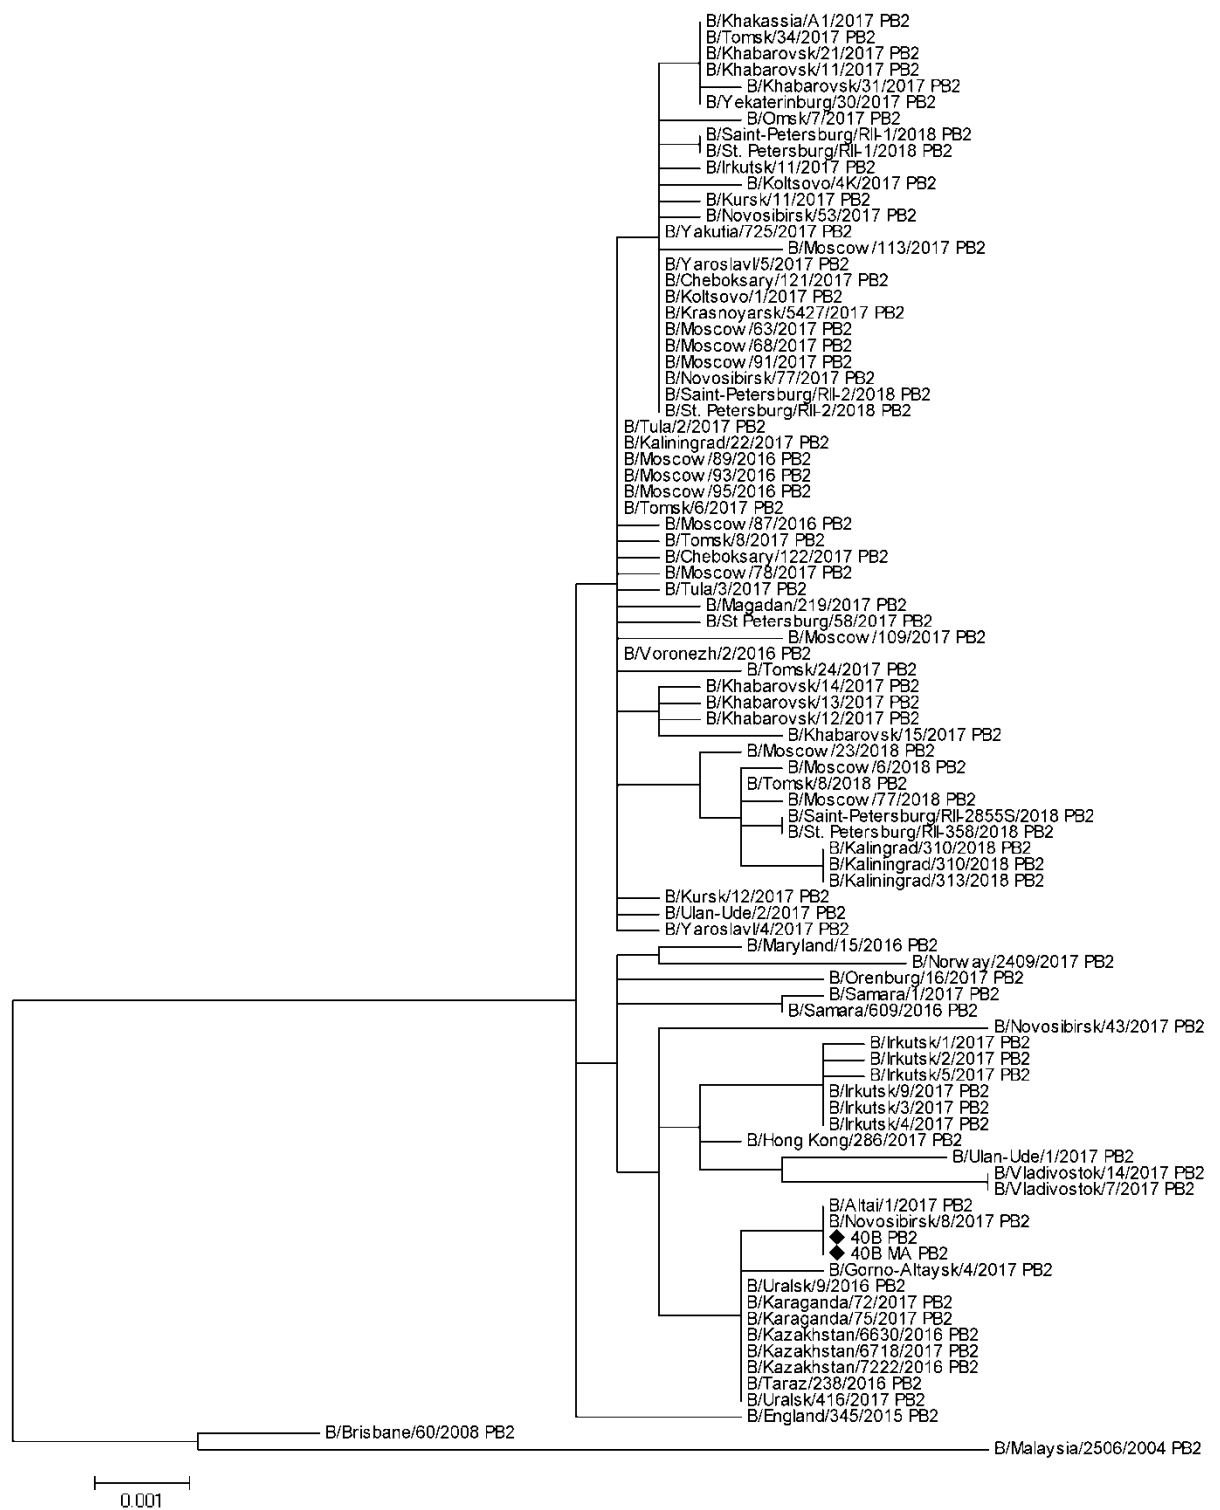

Figure 3. Phylogenetic dendrogram of a segment genome encoding PB2 of influenza B virus. Studied strains are marked with black diamonds.

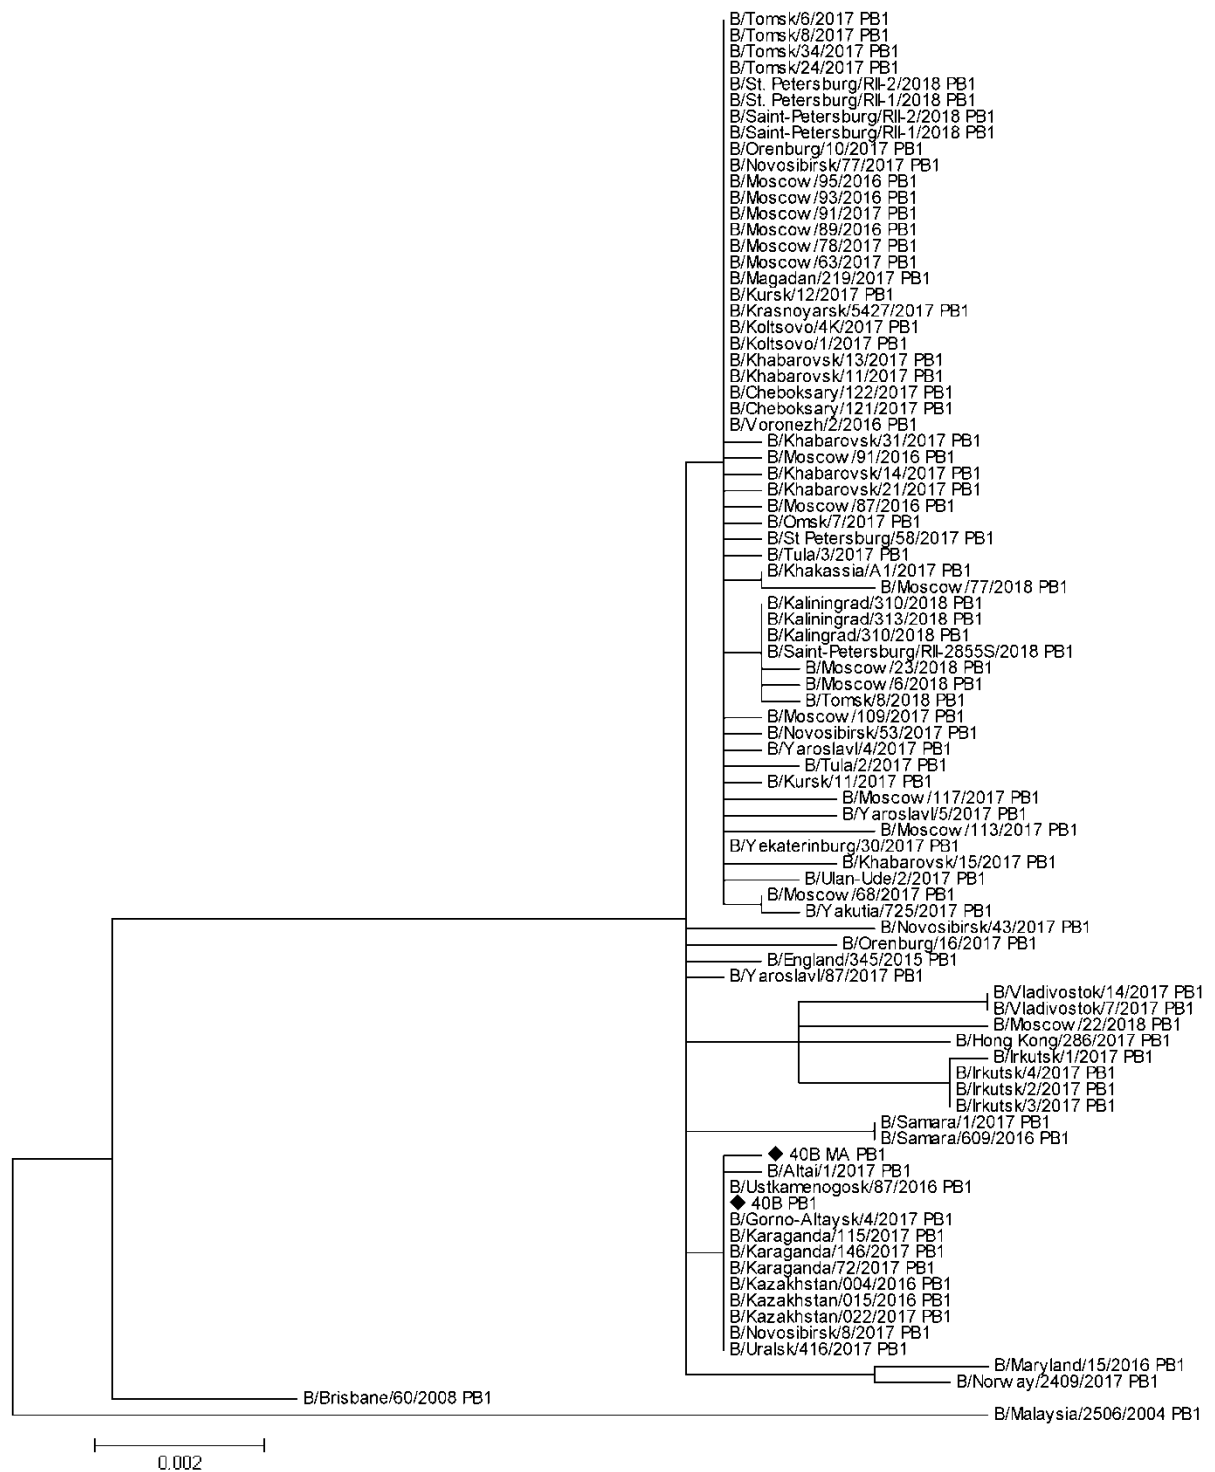

Figure 4. Phylogenetic dendrogram of a segment genome encoding PB1 of influenza B virus. Studied strains are marked with black diamonds.

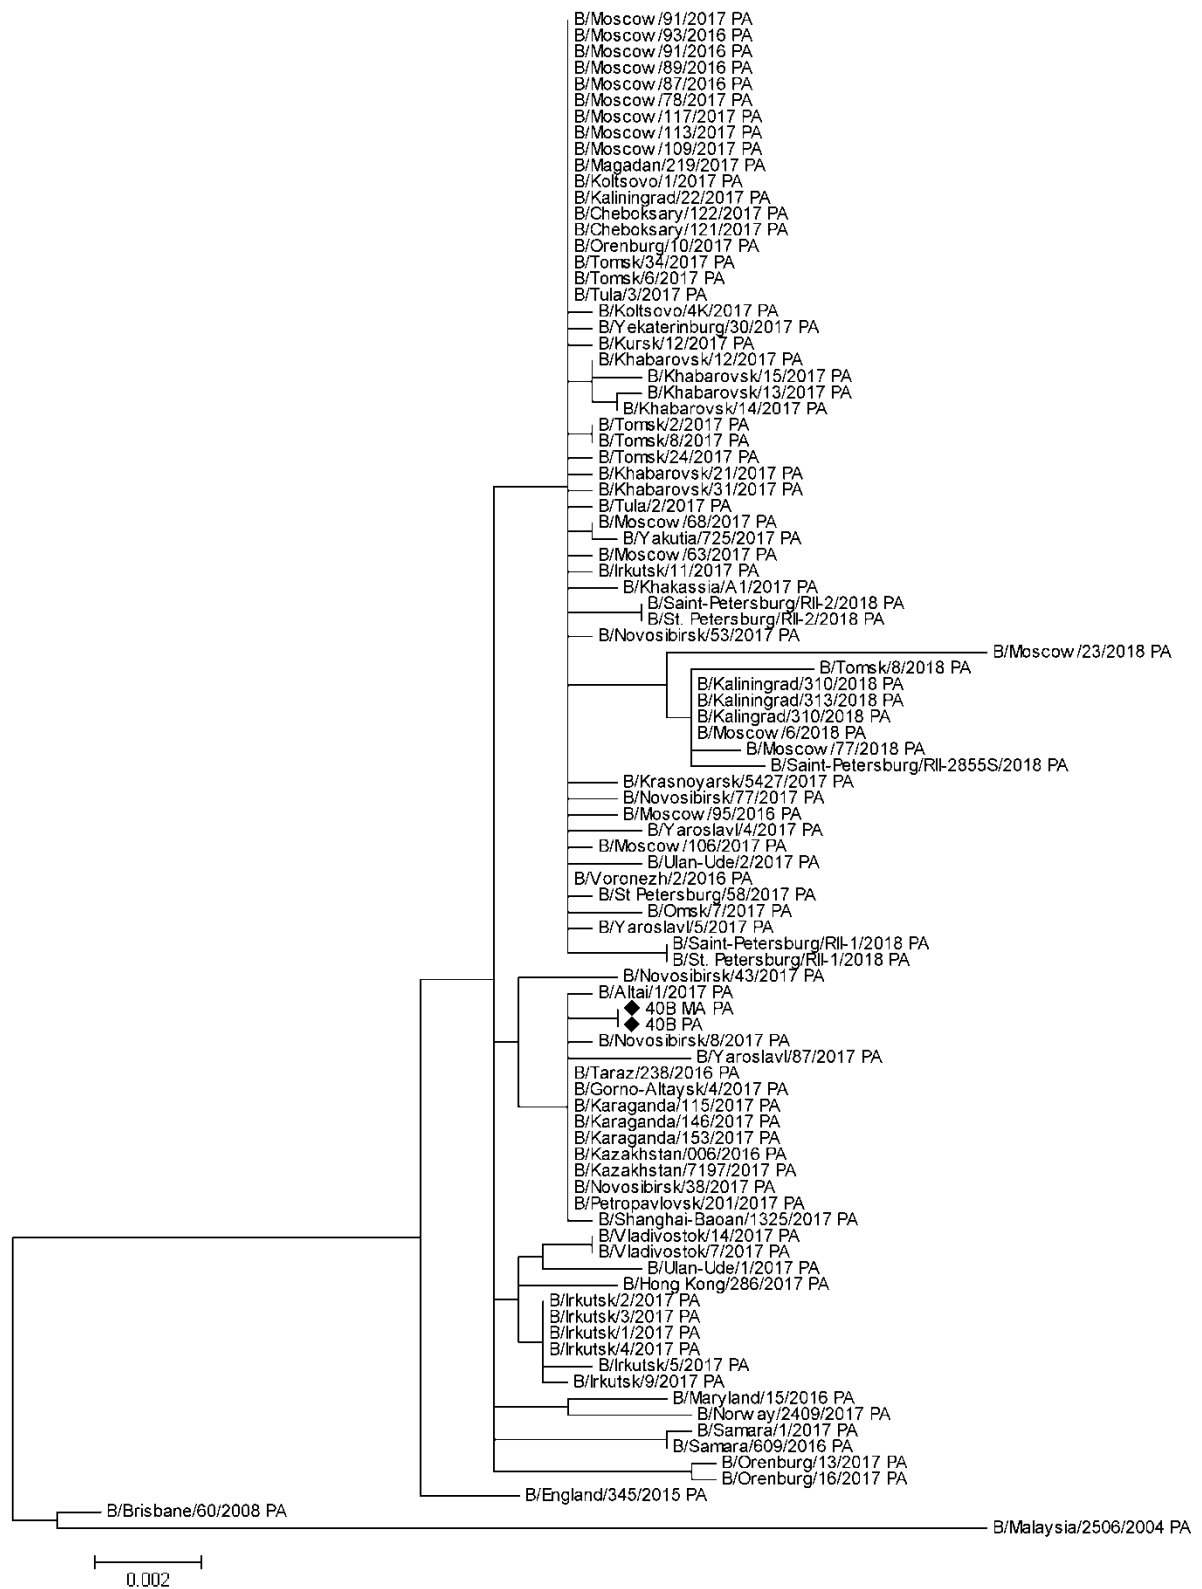

Figure 5. Phylogenetic dendrogram of a segment genome encoding PA of influenza B virus. Studied strains are marked with black diamonds.

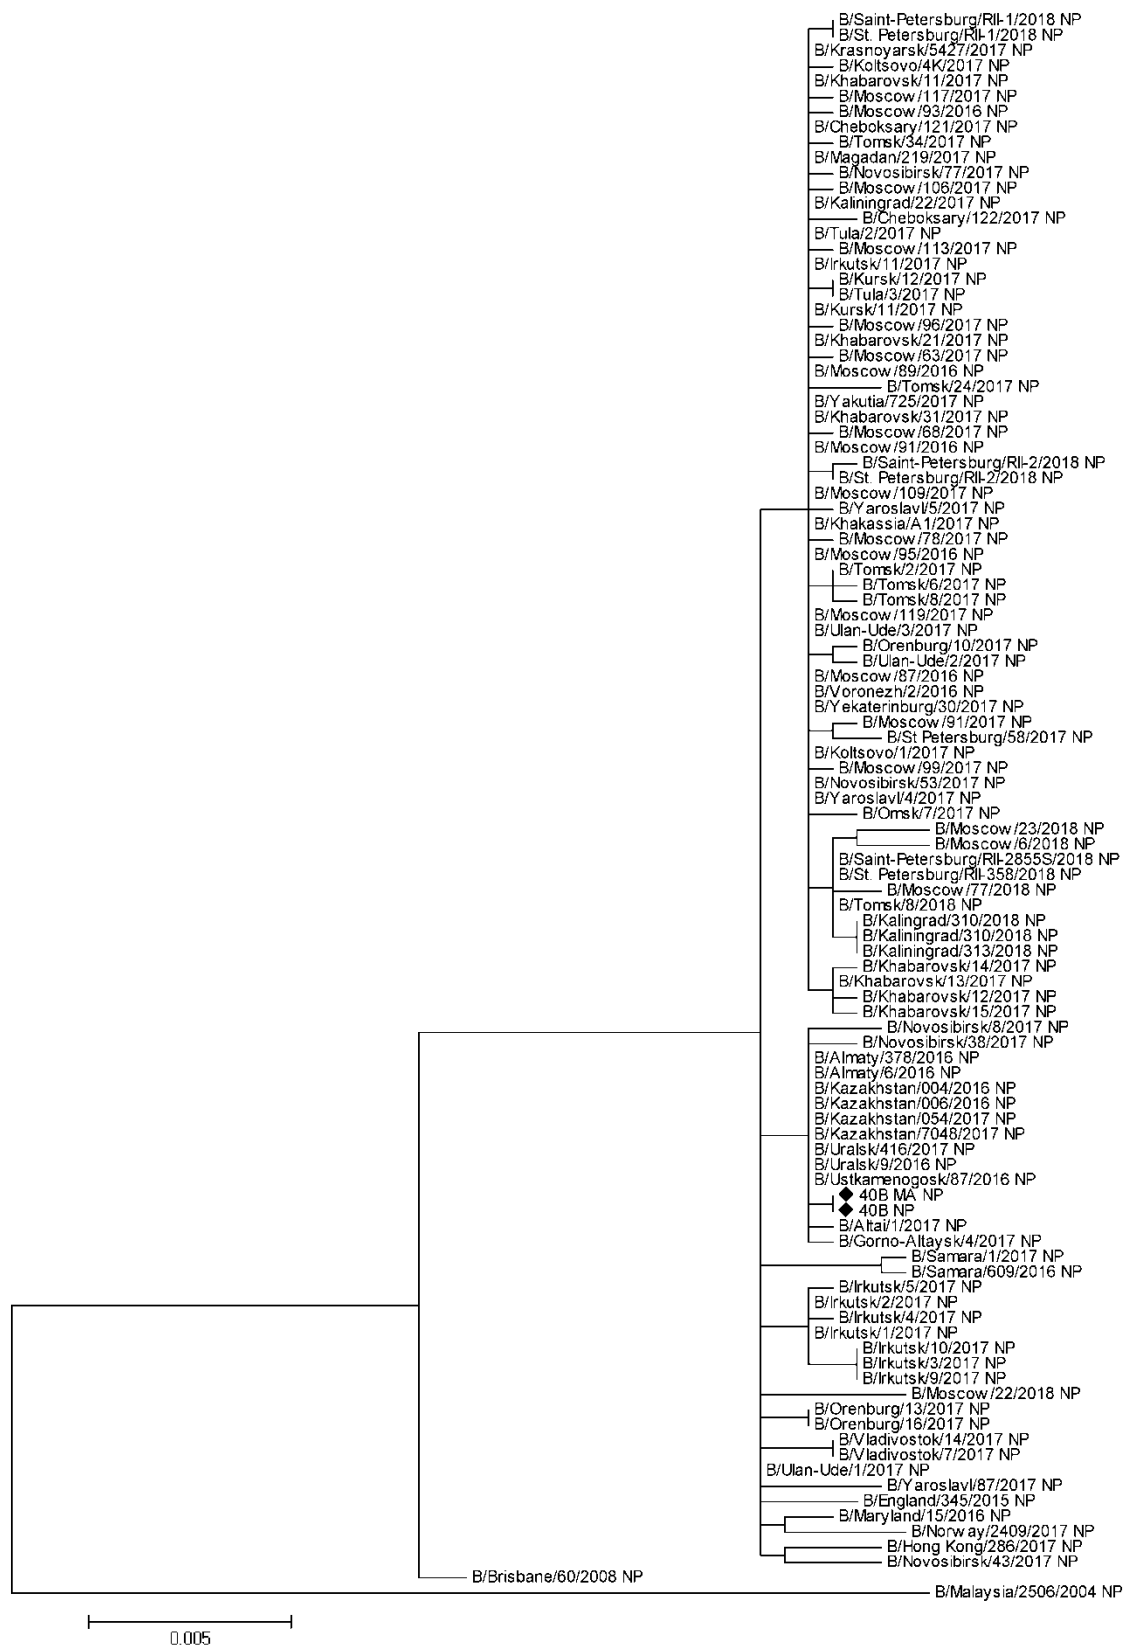

Figure 6. Phylogenetic dendrogram of a segment genome encoding NP of influenza B virus. Studied strains are marked with black diamonds.

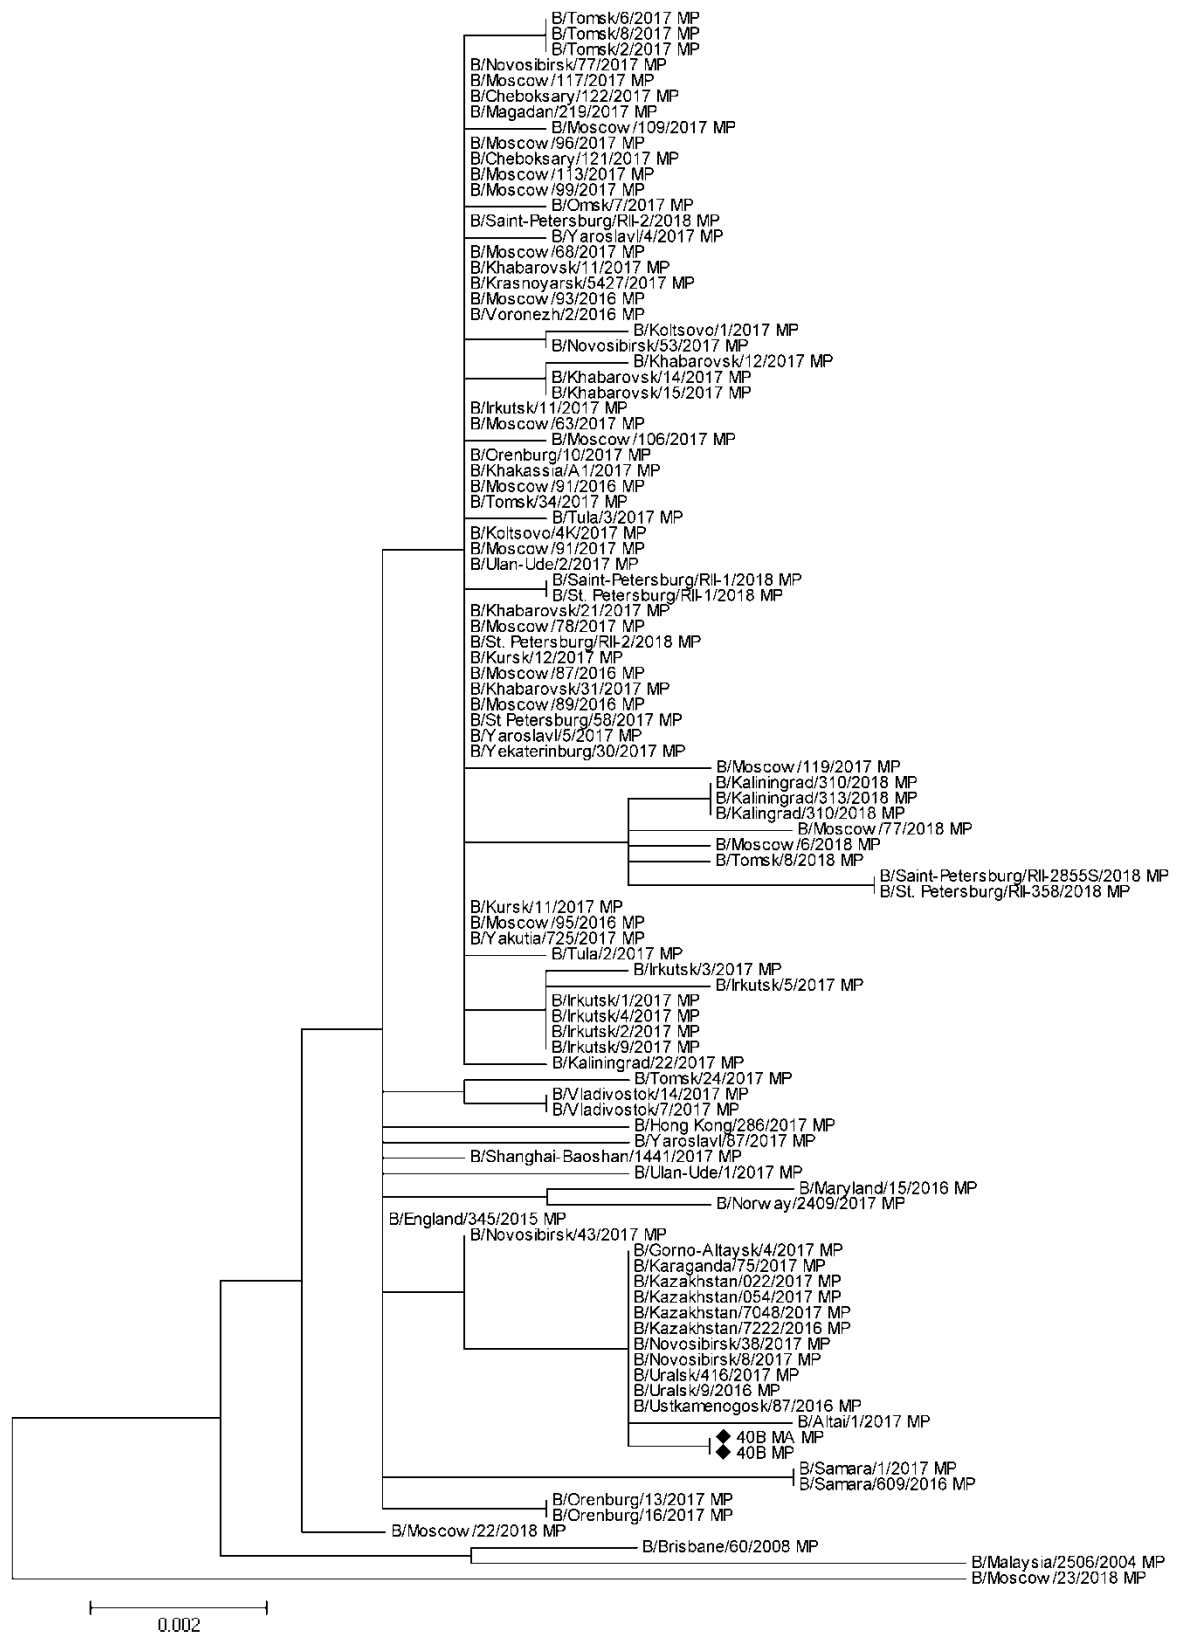

Figure 7. Phylogenetic dendrogram of a segment genome encoding MP of influenza B virus. Studied strains are marked with black diamonds.

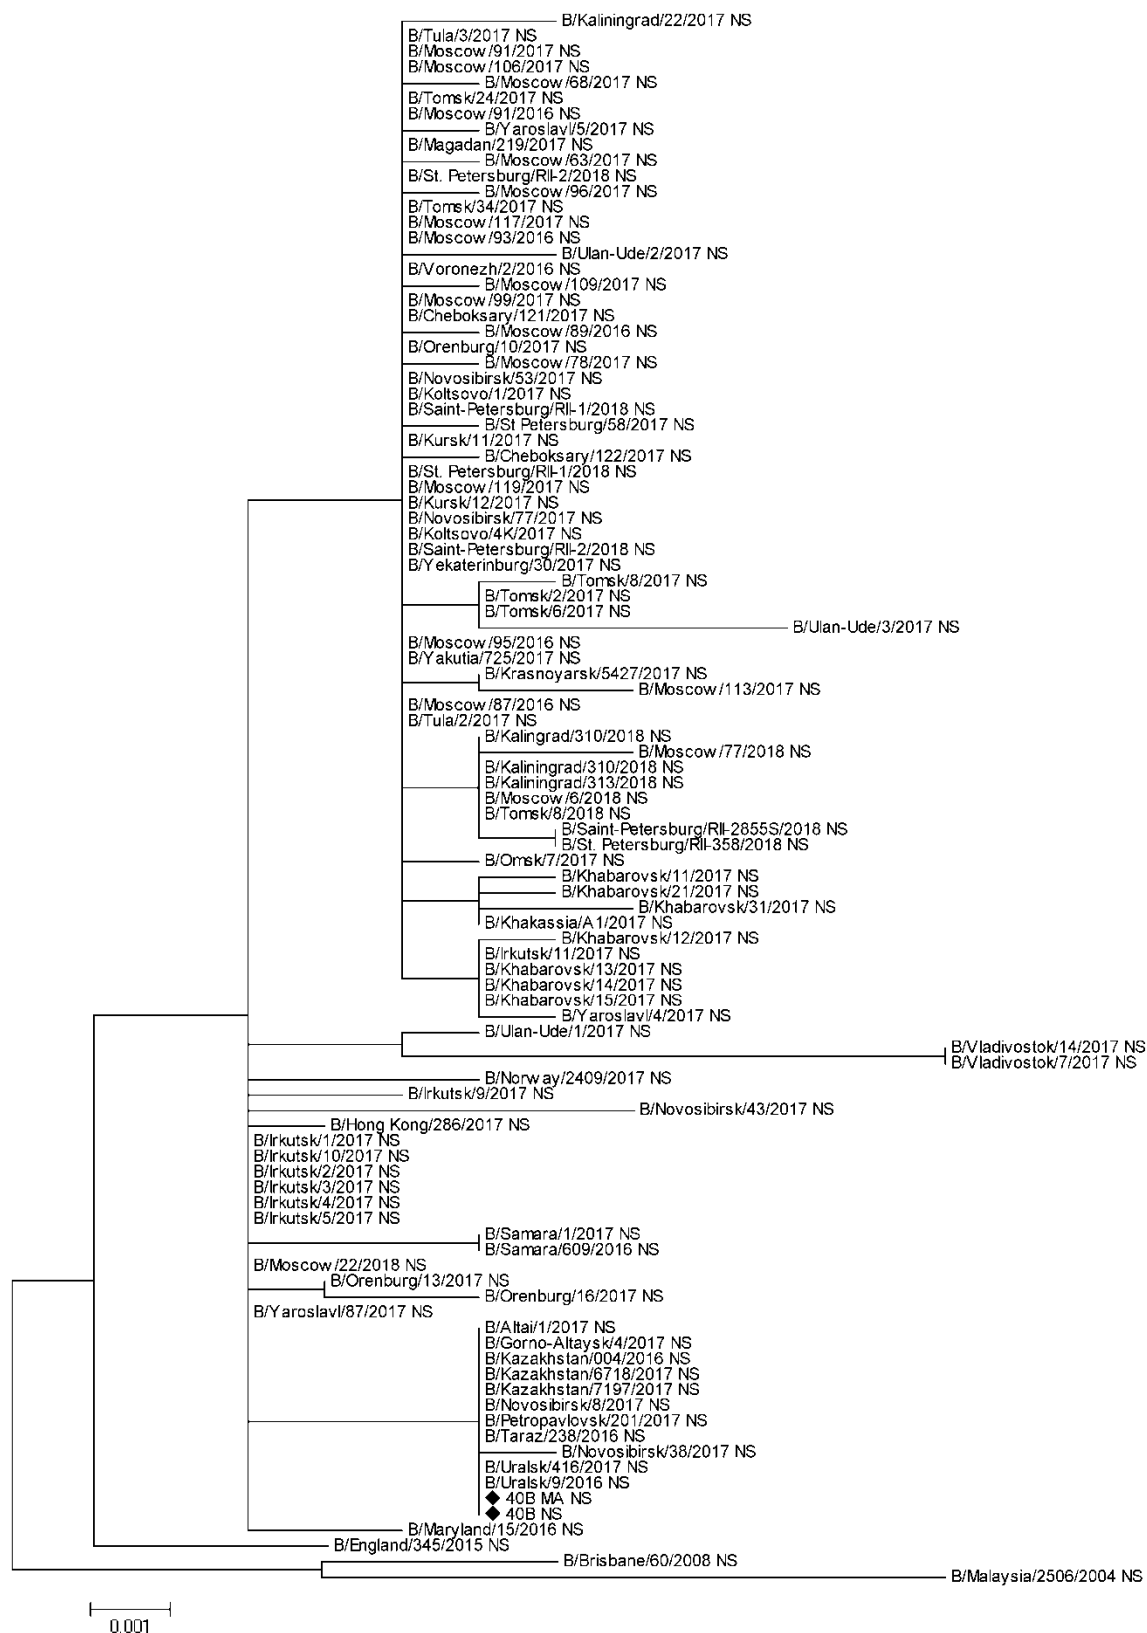

Figure 8. Phylogenetic dendrogram of a segment genome encoding NS of influenza B virus. Studied strains are marked with black diamonds.



Table 1. BLAST-analysis of the influenza B virus genome segments.

| <b>Segment</b> | <b>Name</b>                      | <b>Identity</b>  |
|----------------|----------------------------------|------------------|
| HA             | B/Altai/1/2017 (B/Vic)           | 175/1758 (99%)   |
| NA             | B/Novosibirsk/8/2017 (B/Vic)     | 1408/1408 (100%) |
| PB2            | B/Karaganda/75/2017 (B/Vic)      | 2305/2307 (99%)  |
| PB1            | B/Kazakhstan/022/2017 (B/Vic)    | 2259/2259 (100%) |
| PA             | B/Gorna-Altaysk/4/2017 (B/Vic)   | 2163/2164 (99%)  |
| NP             | B/Kazakhstan/054/2017 (B/Vic)    | 1682/1683 (99%)  |
| MP             | B/Uralsk/416/2017 (B/Vic)        | 1075/1076 (99%)  |
| NS             | B/Petropavlovsk/201/2017 (B/Vic) | 1014/1014 (100%) |
